# Supplementary material for: Automated High-Throughput Quantification of Phenyl-γ-valerolactones and Creatinine in Urine by Laser Diode Thermal Desorption
Source: PubMed Central journal article supplement — J Agric Food Chem. 2023 Oct 27;71(44):16787–96. doi: 10.1021/acs.jafc.3c03888 (PMC10637324; doi:10.1021/acs.jafc.3c03888), 2023-10-27
Supplement: jf3c03888_si_001.pdf [file jf3c03888_si_001.pdf]

Electronic supplementary material (ESI)

**Automated high-throughput quantification of phenyl- $\gamma$ -  
valerolactones and creatinine in urine by laser diode thermal  
desorption**

Jacob Lessard-Lord<sup>a,b,c</sup>, Serge Auger<sup>d</sup>, Sarah Demers<sup>d</sup>, Pier-Luc Plante<sup>a,b</sup>, Pierre Picard<sup>d</sup>, and Yves Desjardins<sup>a,b,c\*</sup>

**Affiliations**

- a) Institute of Nutrition and Functional Foods (INAF), Faculty of Agriculture and Food Sciences, Laval University, 2440 boulevard Hochelaga, Québec, QC, G1V 0A6, Canada
- b) Nutrition, Health and Society Centre (NUTRISS), INAF, Laval University, 2440 boulevard Hochelaga, Québec, QC, G1V 0A6, Canada
- c) Department of Plant Science, Faculty of Agriculture and Food Sciences, Laval University, 2425 rue de l'Agriculture, Québec, QC, G1V 0A6 Canada
- d) Phytronix Technologies, 4535, boulevard Wilfrid-Hamel, Suite #120, Québec, QC, G1P 2J7, Canada

**Supplemental Table S1.** Food and beverage containing flavan-3-ols participants were asked to not consume during study B

| <b>Category</b>   | <b>Item</b>                           |
|-------------------|---------------------------------------|
|                   | <b><u>All the fruits except :</u></b> |
| <b>Fruits</b>     | Citrus                                |
|                   | Pineapple                             |
|                   | Watermelon                            |
| <b>Vegetables</b> | Indian squash                         |
|                   | Rhubarb                               |
| <b>Legumes</b>    | All beans                             |
|                   | Lentil                                |
|                   | Cowpea                                |
|                   | Carob                                 |
| <b>Cereals</b>    | Soy (including tofu, etc.)            |
|                   | Barley                                |
|                   | Buckwheat                             |
|                   | Sorghum                               |
|                   | Millet                                |
|                   | Rice                                  |
| <b>Beverages</b>  | Tea                                   |
|                   | Coffee                                |
|                   | Juice of the fruits to avoid          |
|                   | Wine                                  |
|                   | Beer                                  |
| <b>Others</b>     | Chocolate                             |
|                   | Nuts and peanut                       |
|                   | Avocado                               |
|                   | Cinnamon                              |
|                   | Curry                                 |

**Supplemental Table S2.** Daily dose of (poly)phenols provided by cranberry extract used in study

B

| <b>Class</b>                                | <b>Compound</b>                   | <b>Daily dose (mg)</b> |             |            |
|---------------------------------------------|-----------------------------------|------------------------|-------------|------------|
| <b>Flavan-3-ols</b>                         | Catechin                          | 0.1293                 | ±           | 0.0017     |
|                                             | Epicatechin                       | 1.865                  | ±           | 0.017      |
|                                             | Procyanidin A2                    | 4.46                   | ±           | 0.04       |
|                                             | Procyanidin B2                    | <i>Non detected</i>    |             |            |
|                                             | <b>Flavan-3-ols total*</b>        | <b>82.3</b>            | ±           | <b>0.2</b> |
| <b>Phenolic acids</b>                       | Coumaric acid                     | 2.315                  | ±           | 0.017      |
|                                             | Coumaroyl-hexoside - 1            | 0.415                  | ±           | 0.004      |
|                                             | Coumaroyl-hexoside - 2            | 0.1760                 | ±           | 0.0008     |
|                                             | Coumaroyl-monotropein             | 0.337                  | ±           | 0.003      |
|                                             | Coumaroyl-dihydromonotropein      | 0.716                  | ±           | 0.005      |
|                                             | Chlorogenic acid                  | 1.795                  | ±           | 0.015      |
|                                             | Caffeoyl-hexoside                 | 0.399                  | ±           | 0.004      |
|                                             | Sinapoyl-hexoside                 | 0.403                  | ±           | 0.003      |
|                                             | Vanilloyl-hexoside                | 0.0676                 | ±           | 0.0008     |
|                                             | Feruloyl-hexoside                 | 0.254                  | ±           | 0.002      |
|                                             | 3,4-dihydroxybenzoic acid         | <i>Non detected</i>    |             |            |
|                                             | Dihydroxybenzoic acid - 1         | 0.1285                 | ±           | 0.0014     |
|                                             | Dihydroxybenzoic acid - 2         | 0.0621                 | ±           | 0.0007     |
|                                             | Dihydroxybenzoyl-hexoside         | 0.0451                 | ±           | 0.0006     |
|                                             | Hydroxybenzoyl-hexosyl-hexoside   | 0.1388                 | ±           | 0.0013     |
| <b>Phenolic acids and derivatives total</b> | <b>7.25</b>                       | ±                      | <b>0.05</b> |            |
| <b>Flavonols</b>                            | Quercetin                         | 4.75                   | ±           | 0.06       |
|                                             | Quercetin-3-galactoside           | 1.897                  | ±           | 0.016      |
|                                             | Quercetin-3-rhamnoside            | 0.996                  | ±           | 0.009      |
|                                             | Quercetin-pentoside - 1           | 0.662                  | ±           | 0.005      |
|                                             | Quercetin-pentoside - 2           | 0.421                  | ±           | 0.003      |
|                                             | Quercetin-pentoside - 3           | 0.394                  | ±           | 0.003      |
|                                             | Quercetin-deoxyhexoside           | 0.1125                 | ±           | 0.0010     |
|                                             | Quercetin-hydroxybenzoyl-hexoside | 0.385                  | ±           | 0.004      |
|                                             | Isorhamnetin                      | 0.329                  | ±           | 0.003      |
|                                             | Myricetin                         | 2.18                   | ±           | 0.02       |
|                                             | Myricetin-pentoside 1             | 0.1036                 | ±           | 0.0012     |
|                                             | Myricetin-pentoside - 2           | 0.171                  | ±           | 0.003      |
|                                             | Myricetin-pentoside - 3           | 0.1449                 | ±           | 0.0007     |
|                                             | Myricetin-hexoside                | 1.137                  | ±           | 0.008      |
|                                             | Myricetin methyl                  | 0.220                  | ±           | 0.002      |
| Syringetin-hexoside                         | 0.285                             | ±                      | 0.002       |            |
| <b>Flavonols total</b>                      | <b>14.18</b>                      | ±                      | <b>0.12</b> |            |
| <b>Anthocyanins</b>                         | Cyanidin 3-galactoside            | 1.06                   | ±           | 0.03       |
|                                             | Cyanidin 3-glucoside              | 0.106                  | ±           | 0.002      |
|                                             | Cyanidin 3-arabinoside            | 1.70                   | ±           | 0.04       |
|                                             | Peonidin 3-galactoside            | 1.43                   | ±           | 0.03       |
|                                             | Peonidin 3-glucoside              | 0.052                  | ±           | 0.004      |
|                                             | Peonidin 3-arabinoside            | 1.16                   | ±           | 0.02       |
| <b>Anthocyanins total</b>                   | <b>5.50</b>                       | ±                      | <b>0.13</b> |            |

\* Determined by phloroglucinolysis with a mean degree of polymerization of 5.

**Supplemental Table S3.** Concentration of the working solutions

| <b>Working solution</b> | <b>Concentration (mg/L)</b> |                  |                   |
|-------------------------|-----------------------------|------------------|-------------------|
|                         | <b>3-HPVL</b>               | <b>3,4-DHPVL</b> | <b>Creatinine</b> |
| <b>CS #1</b>            | 0,5                         | 1                | 1000              |
| <b>CS #2</b>            | 1                           | 2                | 2000              |
| <b>CS #3</b>            | 5                           | 10               | 4000              |
| <b>CS #4</b>            | 10                          | 20               | 8000              |
| <b>CS #5</b>            | 15                          | 30               | 16000             |
| <b>CS #6</b>            | 20                          | 40               | 24000             |
| <b>CS #7</b>            | 25                          | 50               | 32000             |
| <b>CS #8</b>            | 30                          | 60               | 40000             |
| <b>QC-L</b>             | 1,5                         | 3                | 3000              |
| <b>QC-M</b>             | 12,5                        | 25               | 12000             |
| <b>QC-H</b>             | 22,5                        | 45               | 30000             |

**Supplemental Table S4.** Transitions used for quantification by UPLC-MS/MS

| <b>Analyte</b>                     | <b>Transition</b> | <b>CE (V)</b> | <b>Transition type</b>      |
|------------------------------------|-------------------|---------------|-----------------------------|
| <b>3-HPVL</b>                      | 191 → 106         | -22           | Quantitative                |
|                                    | 191 → 147         | -18           | Confirmation                |
| <b>3,4-DHPVL</b>                   | 207 → 163         | -18           | Quantitative                |
|                                    | 207 → 122         | -24           | Confirmation                |
| <b>Acetaminophen-d<sub>4</sub></b> | 154 → 111         | -18           | Quantitative & confirmation |
| <b>Creatinine</b>                  | 114 → 86          | 10            | Quantitative                |
|                                    | 114 → 72          | 14            | Confirmation                |
| <b>Creatinine-d<sub>3</sub></b>    | 117 → 89          | 10            | Quantitative                |
|                                    | 117 → 75          | 14            | Confirmation                |

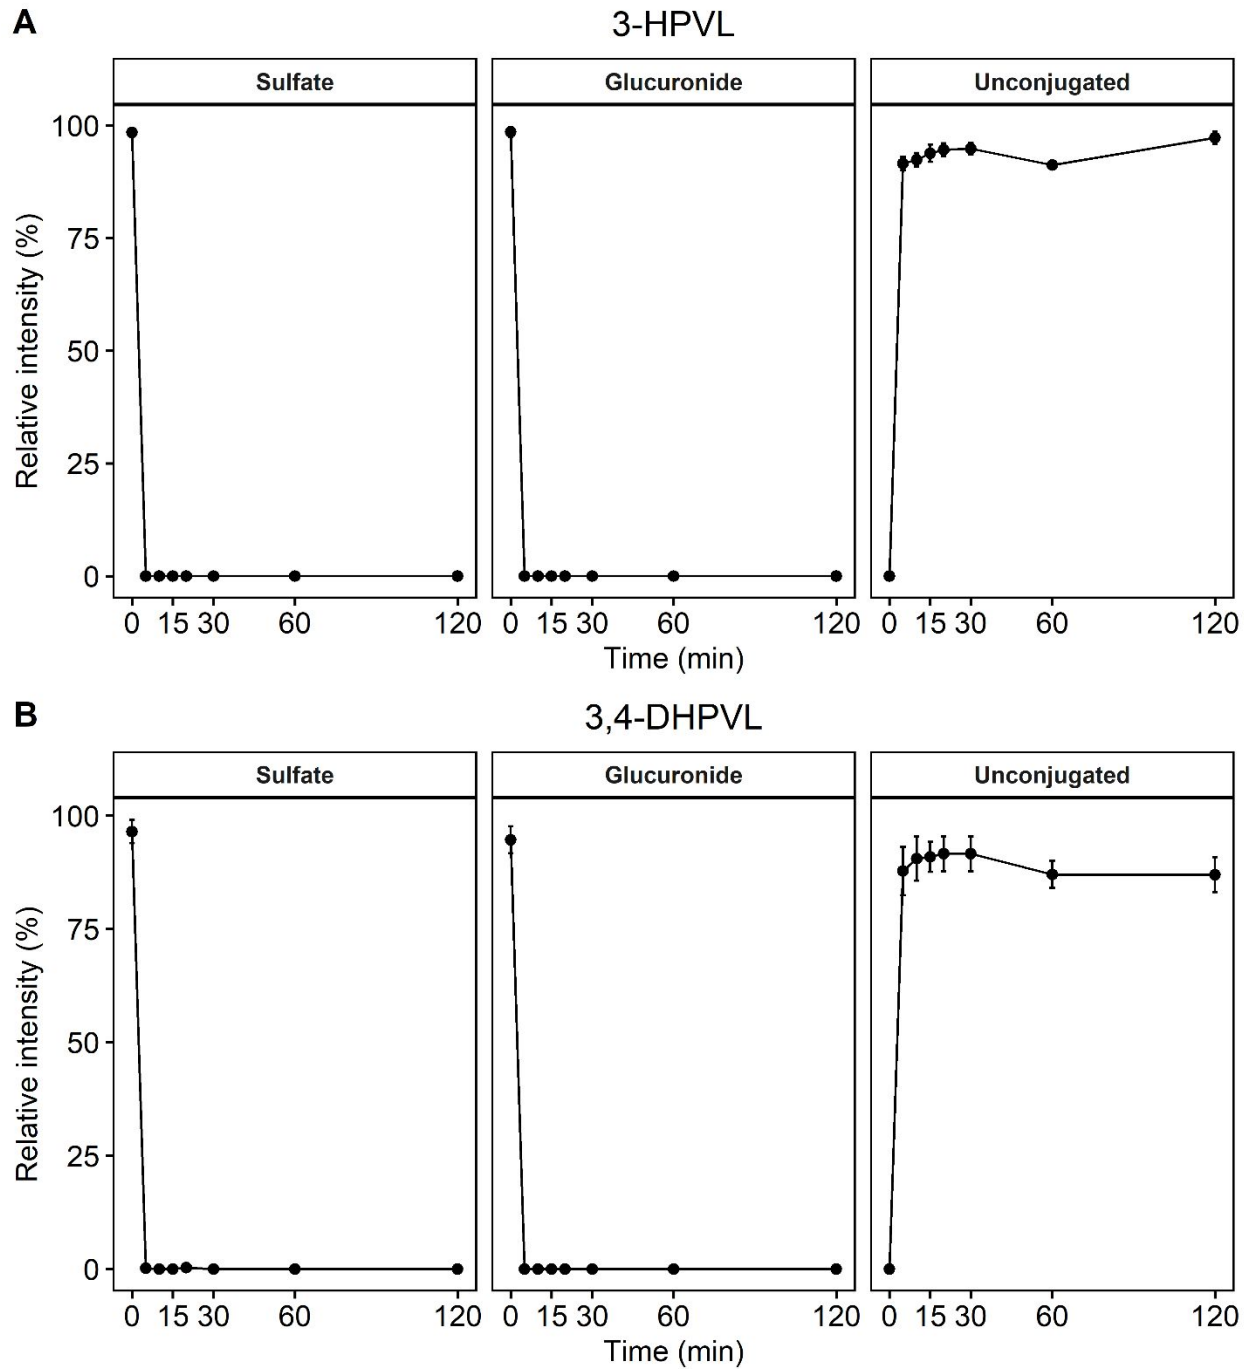

**Supplemental Figure S1: Kinetic of degradation of conjugated PVLs and release of unconjugated PVLs during enzymatic hydrolysis.** Results are expressed as mean of triplicate  $\pm$  standard error of mean.

## Pseudo-code for automated sample preparation

### PVLs

#### **Liquid handler initial state**

- One empty deep-well for liquid-liquid extraction (DW1)
- One deep-well with one row prefilled with working solution and acetonitrile (DW2)
- One empty deep-well for final dilution (DW3)
- One empty Lazwell plate
- One reservoir containing enzyme solution.
- One reservoir containing the internal standards solution.
- One reservoir containing the NaCl saturated solution.
- One reservoir containing the desorption solution.
- One sample holder (carousel or deep-well) loaded with urine samples.
- Two boxes of 300  $\mu$ L tips
- Two boxes of 20  $\mu$ L tips.

#### **Step 1: Transfer 25 $\mu$ l of enzyme to an empty deep-well #1**

##### Enzyme transfer parameters

- Aspiration volume = 45  $\mu$ L
- Dispense volume = 25  $\mu$ L
- Conditioning volume = 50  $\mu$ L
- Aspiration position = 2 mm above bottom of well
- Dispensing position = 1 mm above bottom of well

Pick up 300  $\mu$ L tips.

Condition tip with conditioning volume.

Transfer loop:

- Go to aspiration position in reservoir,
- Aspirate with aspiration volume,
- Go to dispensing position in deep-well and deliver dispense volume,
- Repeat as needed to fill required well in DW1.

Blow out remaining volume in reservoir.

Drop tip into waste.

#### **Step 2: Transfer 50 $\mu$ L of urine sample to deep-well #1**

##### Sample transfer parameters

- Aspiration volume = 50  $\mu$ L
- Conditioning volume = 100  $\mu$ L
- Aspiration position = 2 mm above bottom of well

- Dispensing position = 2 mm above bottom of well

Pick up 300  $\mu$ L tips

Condition tip with conditioning volume

Transfer loop:

- Go to aspiration position in sample holder,
- Aspirate with aspiration volume,
- Go to dispensing position in DW1,
- Drop tips into waste,
- Repeat as needed to transfer every sample in DW1.

### **Step 3: Vortex deep-well #1**

Vortex DW1 for 30 seconds at 1000 rpm.

### **Step 4: Hydrolyze urine samples**

Wait for 300 seconds.

### **Step 5: Transfer internal standards to deep-well #1**

#### Internal standards transfer parameters

- Aspiration volume = 295  $\mu$ L
- Conditioning volume = 300  $\mu$ L
- Aspiration position = 2 mm below solution level
- Dispensing position = 25 mm above bottom of well

Pick up 300  $\mu$ L tips,

Condition tips with conditioning volume,

Transfer loop:

- Go to aspiration position in reservoir,
- Aspirate with aspiration volume,
- Go to dispensing position in deep-well and deliver dispense volume,
- Repeat as needed to add to every used well in DW1,

Drop tips into waste.

### **Step 6: Vortex deep-well**

Vortex deep-well for 30 seconds at 1000 rpm.

### **Step 7: Add working solution (or acetonitrile) to deep-well**

#### Working solution transfer parameters

- Aspiration volume = 5  $\mu$ L



- Conditioning volume = 10  $\mu$ L
- Aspiration position = 2 mm above bottom of well
- Dispensing position = 5 mm above bottom of well

Pick up 20  $\mu$ L tips,

Condition tips with conditioning volume,

Transfer step:

- Go to aspiration position in DW2,
- Aspirate with aspiration volume,
- Go to dispensing position in DW1 and deliver dispense volume,
- Drop tip into waste,
- Repeat as needed.

### **Step 8: Vortex deep-well #1**

Vortex deep-well for 30 seconds at 1000 rpm.

### **Step 9: Transfer NaCl saturated solution to deep-well #1**

#### NaCl solution transfer parameters

- Aspiration volume = 75  $\mu$ L
- Conditioning volume = 100  $\mu$ L
- Aspiration position = 2 mm above bottom of well
- Dispensing position = 25 mm above bottom of well

Pick up 300  $\mu$ L tips,

Condition tip with conditioning volume,

Transfer loop:

- Go to aspiration position in reservoir,
- Aspirate with aspiration volume,
- Go to dispensing position in deep-well and deliver dispense volume,
- Repeat as needed to add to every used well in DW1.

Drop tips into waste.

### **Step 10: Vortex deep-well**

Vortex deep-well for 30 seconds at 1000 rpm.

### **Step 11: Mix upper layer with desorption solution in deep-well #3 and transfer to Lazwell**

#### Desorption solution transfer parameters

- Aspiration volume = 20  $\mu$ L
- Conditioning volume = 20  $\mu$ L

- Aspiration position = 1 mm above bottom of well
- Dispensing position = 2 mm above bottom of well

Upper layer transfer parameters

- Aspiration volume = 20  $\mu$ L
- Mixing volume = 20  $\mu$ L
- Aspiration position = 8 mm above bottom of well
- Dispensing position = 2 mm above bottom of well

Dilution transfer to Lazwell parameters

- Aspiration volume = 4  $\mu$ L
- Aspiration position = 2 mm above bottom of well
- Dispensing position = 1 mm above bottom of well

Transfer loop:

- Pick up 20  $\mu$ L tips
- Condition tip with conditioning volume of desorption solution
- Aspirate with desorption solution aspiration volume
- Go to dispensing position in DW3 and deliver desorption solution
- Go to aspiration position in DW1
- Aspirate with upper layer aspiration volume
- Go to dispensing position in DW3 and deliver solution
- Mix in DW3 by pipetting with mixing volume two times
- Aspirate 3  $\mu$ L air gap
- Go to aspiration position in DW3
- Aspirate with dilution aspiration volume
- Go to dispensing position in LazWell and dispense 7  $\mu$ L
- After dispense, touch tip at the bottom of the LazWell
- Drop tip into waste
- Repeat as needed to dilute and transfer every sample

## **Creatinine**

### **Liquid handler initial state**

- One empty deep-well for sample preparation (DW1)
- One empty deep-well for sample dilution (DW2)
- One Lazwell plate
- Two 300 uL tips rack
- Two 20 uL tips rack
- One reservoir containing dilution solution
- One reservoir containing internal standard solution
- One sample holder (carousel or deep-well) loaded with urine samples.

### **Step 1: Transfer internal standard to deep-well #1**

#### *Internal standard transfer parameters*

- Aspiration volume = 300  $\mu$ L
- Conditioning volume = 200  $\mu$ L
- Aspiration position = 2 mm below solution level
- Dispensing position = 10 mm above bottom of well

Pick up 300  $\mu$ L tips

Condition tip with conditioning volume

Transfer loop:

- Go to aspiration position in internal standard solution reservoir
- Aspirate with aspiration volume
- Go to appropriate dispensing position in DW1 and deliver dispense volume,
- Repeat as needed to fill required well in DW1.

Drop tips into waste

### **Step 2: Transfer samples to deep-well #1**

#### *Samples transfer parameters*

- Aspiration volume = 40  $\mu$ L
- Mixing volume = 200  $\mu$ L
- Aspiration position = 2 mm above bottom of well
- Dispensing position = 2 mm above bottom of well
- Mixing position = 5 mm above bottom of well

Transfer loop:

- Pick up 300  $\mu$ L tips
- Go to aspiration position in sample container (carousel or sample deep-well)
- Condition tip with mixing volume

- Aspirate with aspiration volume
- Go to appropriate dispensing position in DW1 and deliver dispense volume
- Mix with mixing volume six times
- Drop tips into waste
- Repeat as needed to transfer every sample in DW1

### **Step 3: Dilution solution transfer to deep-well #2**

#### *Dilution solution transfer parameters*

- Aspiration volume = 300  $\mu\text{L}$
- Conditioning volume = 200  $\mu\text{L}$
- Aspiration position = 2 mm below solution level
- Dispensing position = 5 mm above bottom of well

Pick up 300  $\mu\text{L}$  tips

Condition tips with conditioning volume

Transfer loop:

- Go to aspiration position in dilution solution reservoir,
- Aspirate with aspiration volume
- Go to appropriate dispensing position in DW2 and deliver dispense volume,
- Repeat as needed to fill required well in DW2.

Drop tips into waste

### **Step 4: Transfer prepared urine sample to deep-well #2**

#### *Prepared urine transfer parameters*

- Aspiration volume = 3  $\mu\text{L}$
- Mixing volume = 10  $\mu\text{L}$
- Aspiration position = 5 mm above bottom of well
- Dispensing position = 5 mm above bottom of well
- Mixing position = 5 mm above bottom of well

Transfer loop:

- Pick up 20  $\mu\text{L}$  tips
- Go to aspiration position in DW1
- Aspirate with aspiration volume
- Go to dispensing position in DW2 and deliver dispense volume
- Drop tip into waste
- Repeat as needed to transfer every prepared urine sample

### **Step 5: Vortex deep-well**

Vortex deep-well for 30 seconds at 1000 rpm.

## **Step 6: Transfer diluted urine samples to Lazwell**

### *Transfer to Lazwell parameters*

- Aspiration volume = 4  $\mu\text{L}$
- Conditioning volume = 4  $\mu\text{L}$
- Aspiration position = 5 mm above bottom of well
- Dispensing position = 1 mm above bottom of well

### Transfer loop:

- Pick up 20  $\mu\text{L}$  tips
- Move to aspiration position in DW2
- Condition tip with conditioning volume
- Aspirate 3  $\mu\text{L}$  air gap
- Aspirate with aspiration volume
- Go to dispensing position in LazWell and dispense 7  $\mu\text{L}$
- After dispense, touch tip at the bottom of the LazWell
- Drop tip into waste
- Repeat as needed to transfer every diluted urine sample
